# Supplementary material for: A newly synthesized highly stable Ag/N-carbon electrode for enhanced desalination by capacitive deionization
Source: Royal Society of Chemistry journal article supplement (doi:10.1039/d0en00826e), 2020-01-01
Supplement: d0en00826e1.pdf [file d0en00826e1.pdf]

**A New Synthesized Highly-Stable Ag/N-Carbon Electrode for Enhanced  
Desalination by Capacitive Deionization**

Yingjie He<sup>a</sup>, Lei Huang<sup>a</sup>, Yixian Zhaao<sup>a</sup>, Weichun Yang<sup>a,b,d</sup>, Taixu Hao<sup>a</sup>, Bichao Wu<sup>a</sup>,  
Haoyu Deng<sup>a</sup>, Dun, Wei<sup>a</sup>, Haiying Wang<sup>a,b,d\*</sup> and Jian Luo<sup>c</sup>

<sup>a</sup> Department of Environmental Engineering, School of Metallurgy and Environment,  
Central South University, Changsha, 410083, P.R. China.

<sup>b</sup> Chinese National Engineering Research Center for Control & Treatment of Heavy  
Metal Pollution, Changsha, 410083, P. R. China.

<sup>c</sup> School of Civil and Environmental Engineering, Georgia Institute of Technology,  
Atlanta, Georgia 30332-0355, United States.

<sup>d</sup> Water Pollution Control Technology Key Lab of Hunan Province, Changsha,  
410083, P. R. China

\*Corresponding authors: Haiying Wang, haiyw25@yahoo.com

## Content

1. Figure S1 The FTIR spectrum of PmPD (a) and AC (b) before and after adsorb  $\text{Ag}^+$ .
2. Figure S2 SEM image of CNP (a), Ag/N-CNP-60-2 (b), Ag/N-CNP-120-24 (c) and c-AC-Ag-60-12 (d).
3. Figure S3 Particle size distribution of Ag/N-CNP-60-12.
4. Figure S4. The FTIR and Raman spectrums of the series of the Ag/N-CNP.
5. Figure S5 The CV curves of CNP and Ag/N-CNP-60-12 in 1M NaCl (a) and 500ppm  $\text{Cl}^-$  solution (b).
6. Figure S6 The Nyquist plot of CNP and Ag/N-CNP electrode in 1M NaCl and 500ppm  $\text{Cl}^-$  solution.
7. Figure S7 EDS mapping of Ag/N-CNP-60-12, initial (a, b), after 10 cycles (c,d) and after 100 cycles (e, f).
8. Figure S8 Schematic of *in-situ* Raman experiments set-up.
9. Figure S9 The Raman spectra of purely AgCl.
10. Figure S10 Picture of the Ag/N-CNP-60-12 electrode at the initial, after electrosorption, and after electrodesorption.
11. Figure S11 The XRD spectra of initial Ag/N-CNP-60-12 and after 100 cycles.
12. Figure S12 XPS spectra of Ag 3d (a), N 1s (b) after 100 cycles.
13. Figure S13 Current-time plots of CNP and Ag/N-CNP electrodes.
14. Table S1 XPS elemental contents of CNP and Ag/N-CNP-60-12.
15. Table S2 EDS elemental contents of initial Ag/N-CNP-60-12.
16. Table S3 EDS elemental contents of Ag/N-CNP-60-12 after 10 cycles.
17. Table S4. EDS elemental contents of Ag/N-CNP-60-12 after 100 cycles.

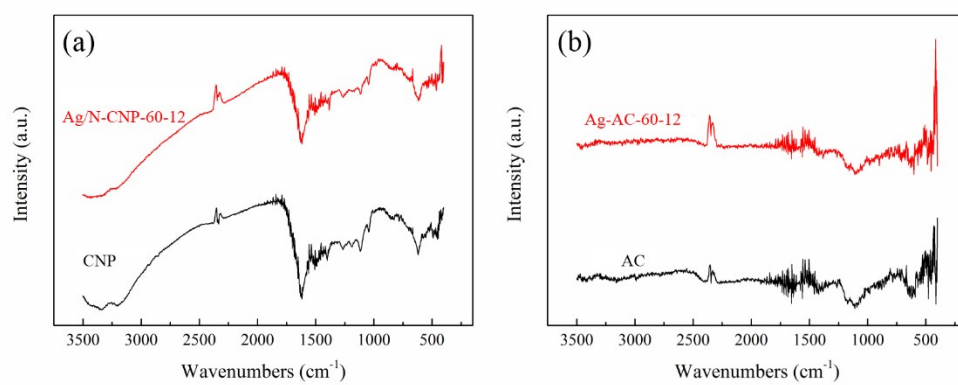

**Figure S1.** The FTIR spectrum of PmPD (a) and AC (b) before and after adsorb Ag<sup>+</sup>.

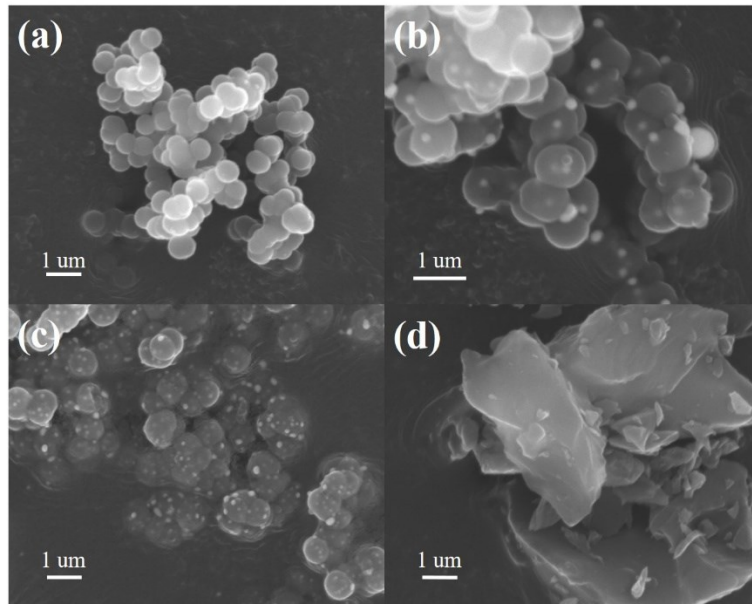

**Figure S2.** SEM image of CNP (a), Ag/N-CNP-60-2 (b), Ag/N-CNP-120-24 (c) and c-AC-Ag-60-12 (d).

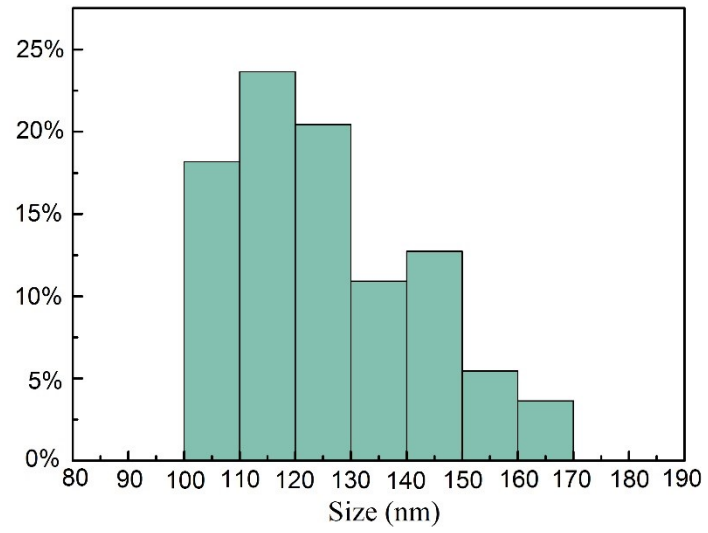

**Figure S3.** Particle size distribution of Ag/N-CNP-60-12.

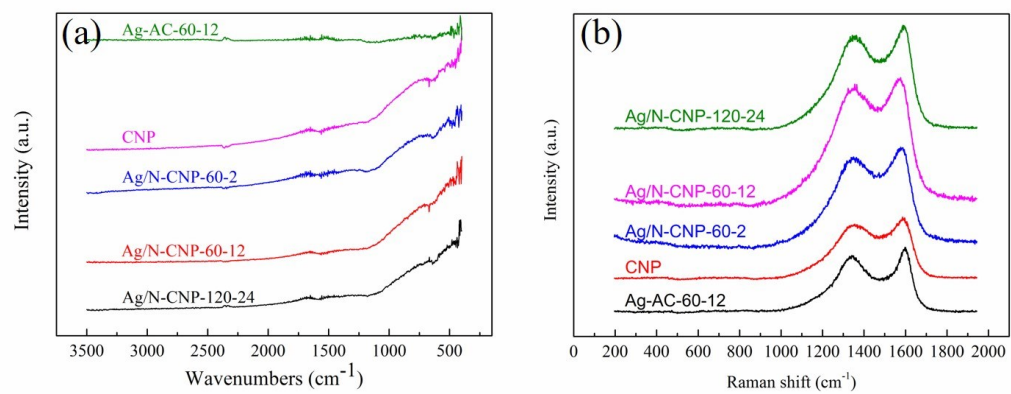

**Figure S4.** The FTIR and Raman spectrums of the series of the Ag/N-CNP.

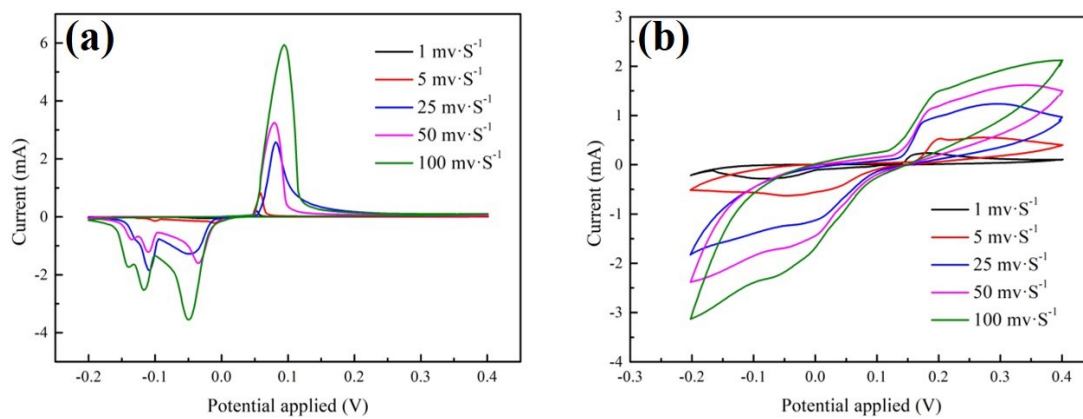

**Figure S5.** The CV curves of CNP and Ag/N-CNP-60-12 in 1M NaCl (a) and 500ppm Cl<sup>-</sup> solution (b).

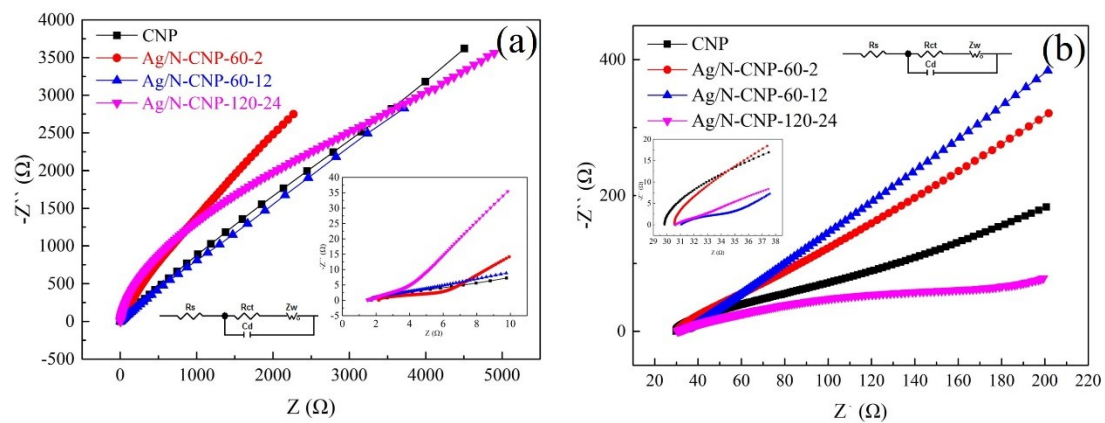

**Figure S6.** The Nyquist plot of CNP and Ag/N-CNP electrode in 1M NaCl (a) and 500ppm  $\text{Cl}^-$  solution (b).



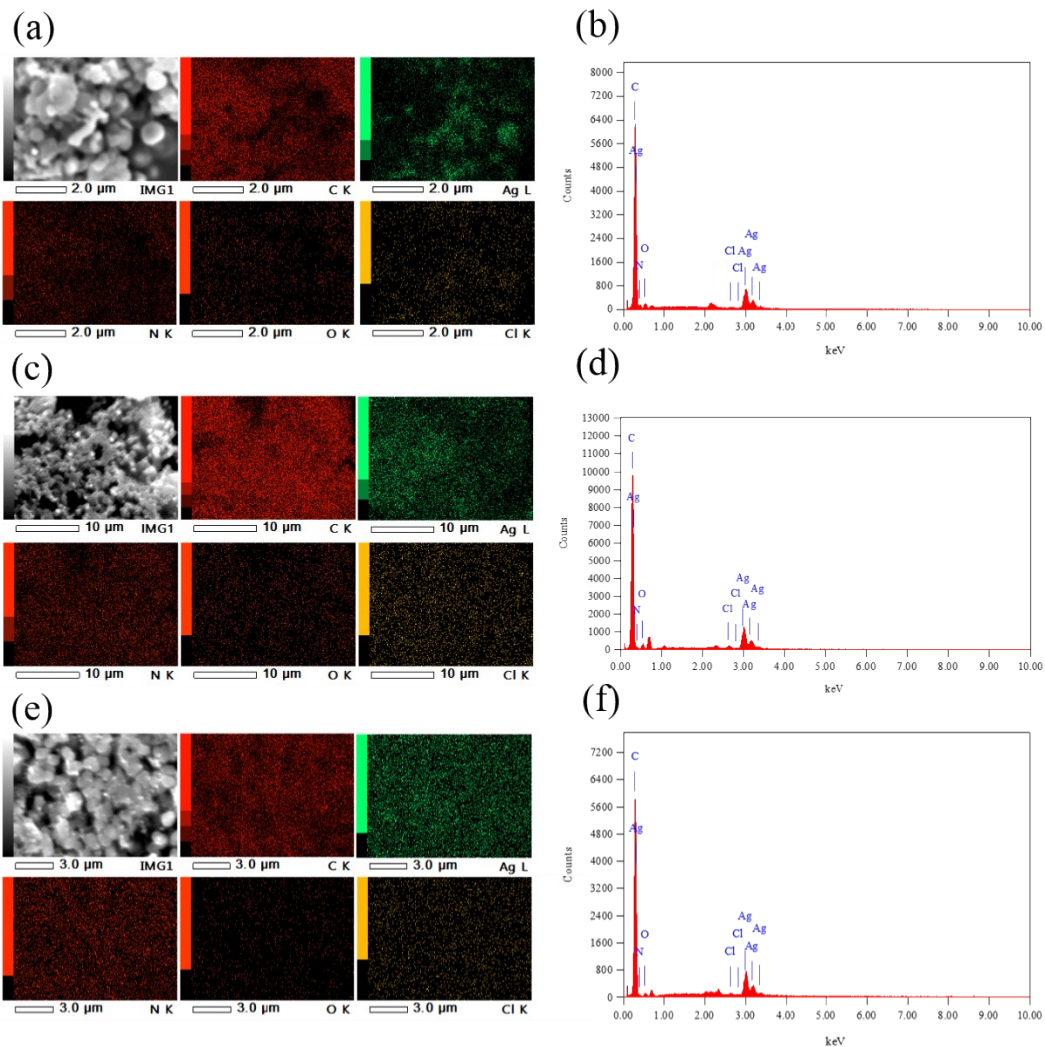

**Figure S7.** EDS mapping of Ag/N-CNP-60-12, initial (a, b), after 10 cycles (c,d) and after 100 cycles (e, f).

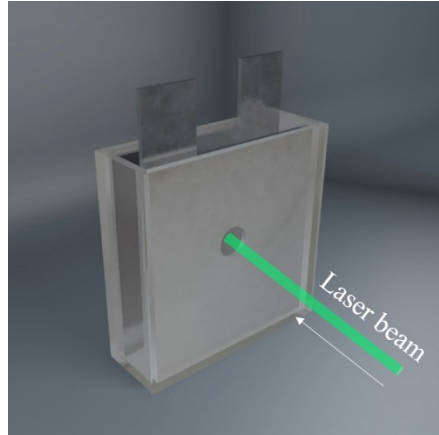

**Figure S8.** Schematic of *in-situ* Raman experiments set-up.

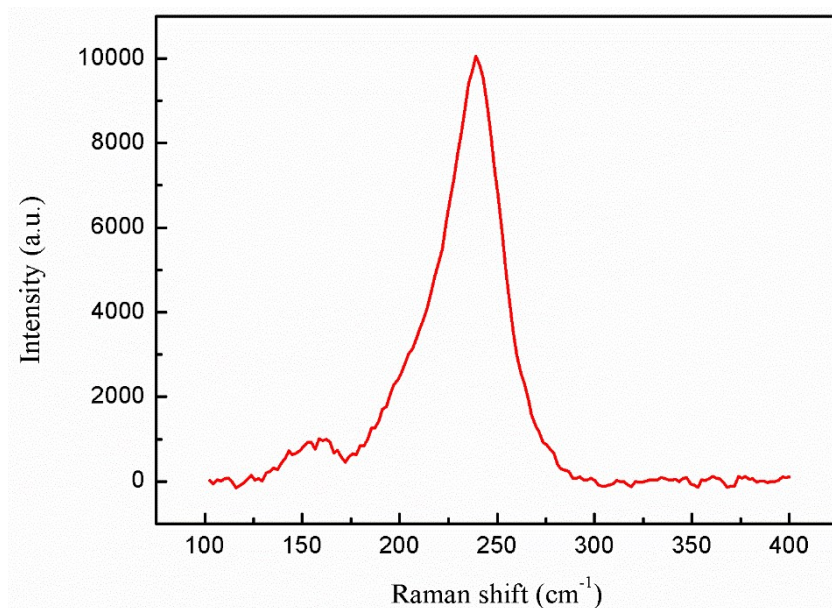

**Figure S9.** The Raman spectra of purely AgCl.

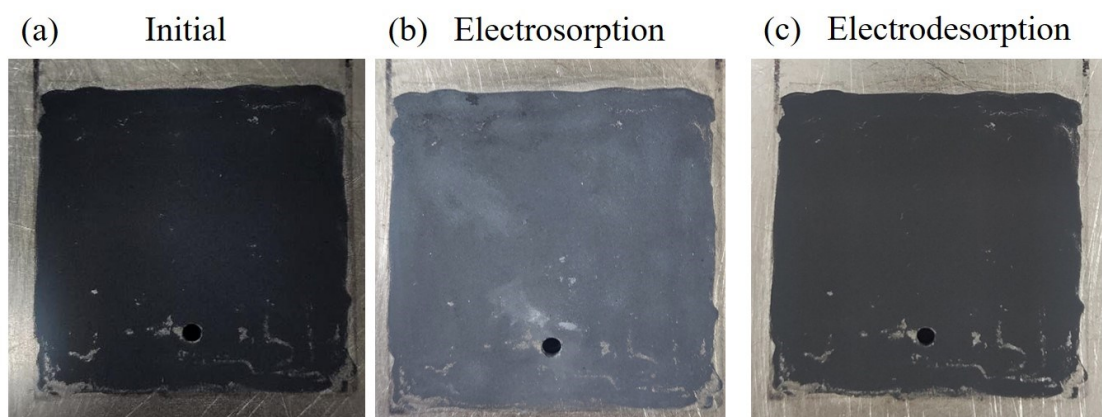

**Figure S10** Picture of the Ag/N-CNP-60-12 electrode at the initial, after electrosorption, and after electrodesorption.

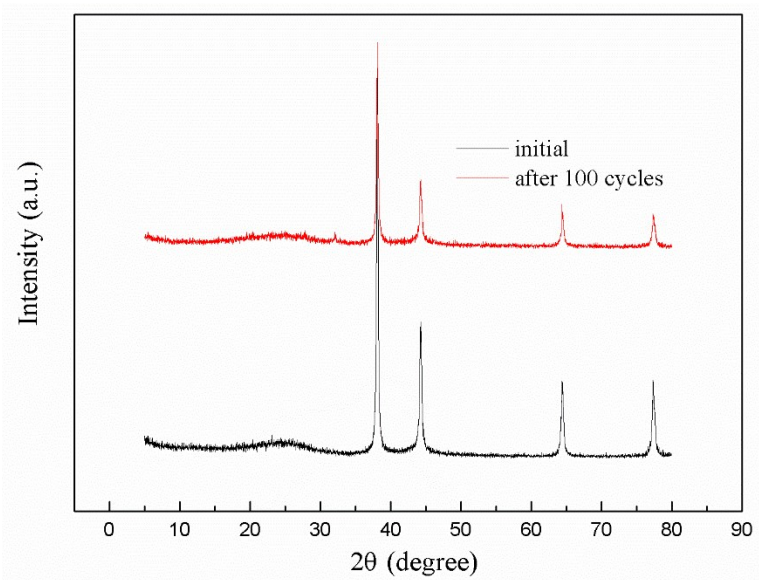

**Figure S11.** The XRD spectra of initial Ag/N-CNP-60-12 and after 100 cycles.

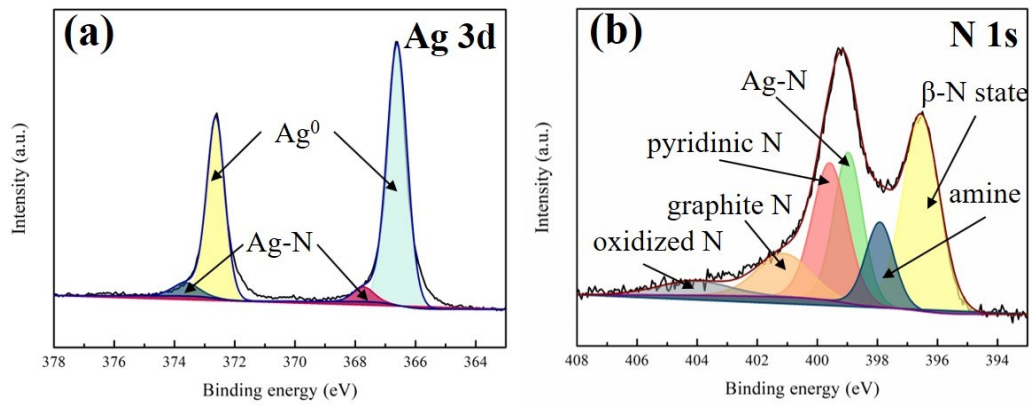

**Figure S12.** XPS spectra of Ag 3d (a), N 1s (b) after 100 cycles.

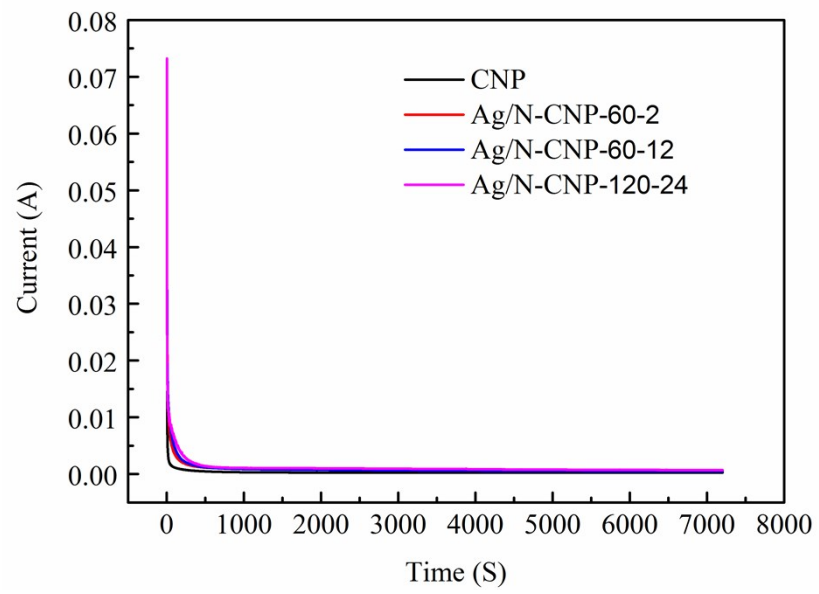

**Figure S13.** Current-time plots of CNP and Ag/N-CNP electrodes.

**Table S1.** XPS elemental contents of CNP and Ag/N-CNP-60-12.

| Samples         | C 1s  | Ag 3d | N 1s | O 1s |
|-----------------|-------|-------|------|------|
| CNP             | 93.35 | 0.33  | 1.16 | 5.16 |
| Ag/N-CNP-60-2   | 88.2  | 0.87  | 6.97 | 3.95 |
| Ag/N-CNP-60-12  | 86.77 | 1.84  | 6.07 | 5.32 |
| Ag/N-CNP-120-24 | 81.76 | 4.71  | 8.51 | 5.01 |



**Table S2.** EDS elemental contents of initial Ag/N-CNP-60-12.

| Element    | Mass % | Atom % |
|------------|--------|--------|
| C K (Ref.) | 74.47  | 95.10  |
| N K        | 0.56   | 0.62   |
| O K        | 0.91   | 0.87   |
| Cl K       | ND     | ND     |
| Ag K       | 24.06  | 3.42   |

**Table S3.** EDS elemental contents of Ag/N-CNP-60-12 after 10 cycles.

| Element    | Mass % | Atom % |
|------------|--------|--------|
| C K (Ref.) | 76.19  | 95.79  |
| N K        | 0.24   | 0.26   |
| O K        | 0.79   | 0.70   |
| Cl K       | 0.21   | 0.09   |
| Ag K       | 22.62  | 3.16   |

**Table S4.** EDS elemental contents of Ag/N-CNP-60-12 after 100 cycles.

| Element    | Mass % | Atom % |
|------------|--------|--------|
| C K (Ref.) | 78.19  | 96.39  |
| N K        | 0.10   | 0.10   |
| O K        | 0.58   | 0.54   |
| Cl K       | 0.24   | 0.10   |
| Ag K       | 20.89  | 2.89   |
